# Supplementary material
Source: PubMed Central journal article supplement (PMC3370582)
Supplement: supp_80.6.2100_IAI-IAI06018-11-s01.pdf [file supp_80.6.2100_IAI-IAI06018-11-s01.pdf]

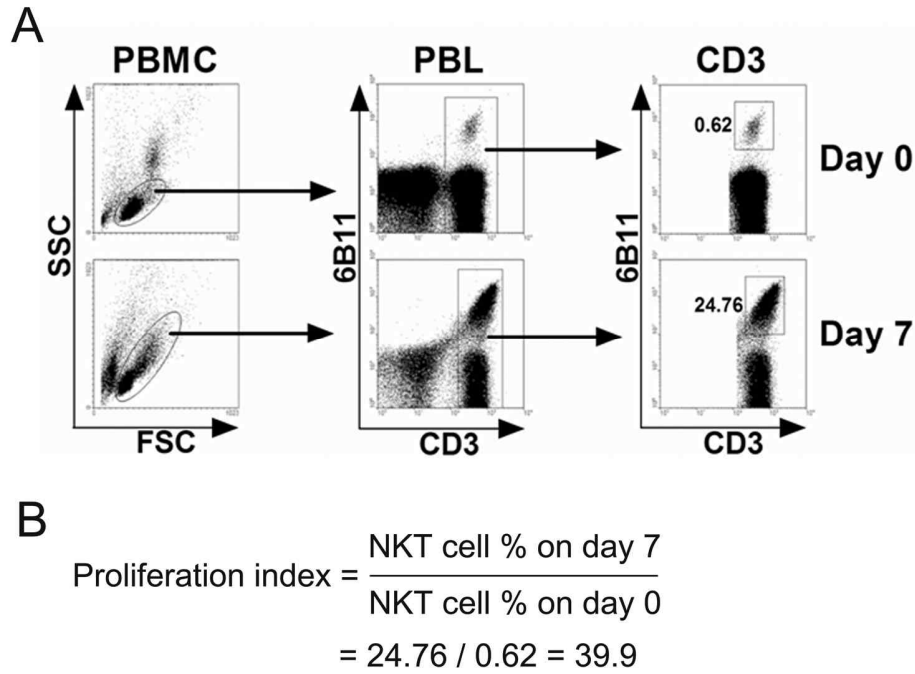

**Fig. S1. A representative FACS analysis for proliferation indices of NKT cells.** Freshly isolated PBMCs ( $1 \times 10^6$  cells/well) from a HC subject were cultured for 7 days in the presence of IL-2 (100 U/ml) and  $\alpha$ -GalCer (100 ng/ml). The cells were then stained with PerCP-conjugated anti-CD3 and PE-conjugated anti-6B11 MAbs. NKT cell percentages within CD3<sup>+</sup> T cells were determined by flow cytometry on day 0 and after culture on day 7 (A). Proliferation index was defined the ratio of NKT cell percentage within CD3<sup>+</sup> T cells on day 7 to NKT cell percentage within CD3<sup>+</sup> T cells on day 0, and the index is expressed as a fold increase (B).

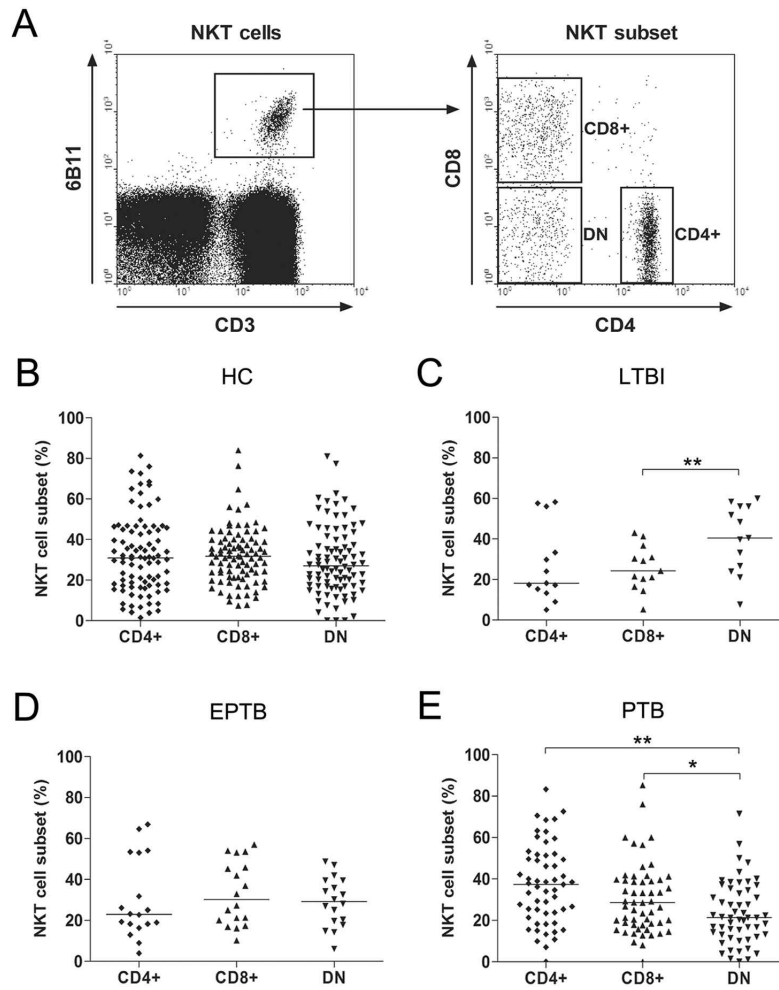

**Fig. S2. NKT cell subset levels in the PB samples of HCs, LTBI subjects, EPTB patients, and PTB patients.** Freshly isolated PBMCs from 90 age- and sex-matched HCs, 13 LTBI subjects, 18 patients with EPTB, and 55 patients with PTB were stained with PerCP-conjugated anti-CD3, FITC-conjugated anti-CD4, APC-conjugated anti-CD8, and PE-conjugated anti-6B11 MAbs and then analyzed by flow cytometry. A representative flow cytometry result for NKT cell subsets (e.g., CD4+, CD8+, and DN NKT cells) is shown (A). NKT cell subset levels in the PB samples of HCs (B), LTBI subjects (C), EPTB patients (D), and PTB patients (E). Symbols represent subjects, and horizontal lines are median values. \*,  $P < 0.05$ ; \*\*,  $P < 0.01$  by Wilcoxon signed rank test.

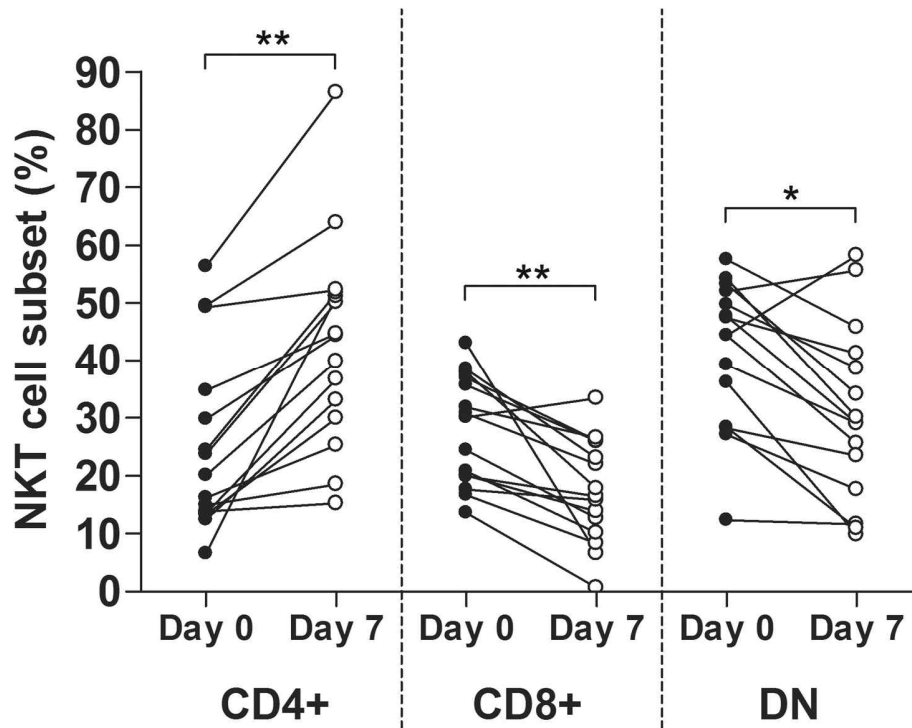

**Fig. S3. Changes in NKT cell subset levels after stimulation with  $\alpha$ -GalCer.** Freshly isolated PBMCs ( $1 \times 10^6$  cells/well) from 15 HCs were cultured for 7 days in the presence of IL-2 (100 U/ml) and  $\alpha$ -GalCer (100 ng/ml). The cells were then stained with PerCP-conjugated anti-CD3, FITC-conjugated anti-CD4, APC-conjugated anti-CD8, and PE-conjugated anti-6B11 MAbs. Percentage of each subset within CD3+6B11+ NKT cells was determined by flow cytometry on day 0 and after culture on day 7. \*,  $P < 0.01$ ; \*\*,  $P < 0.001$  by Wilcoxon signed rank test.

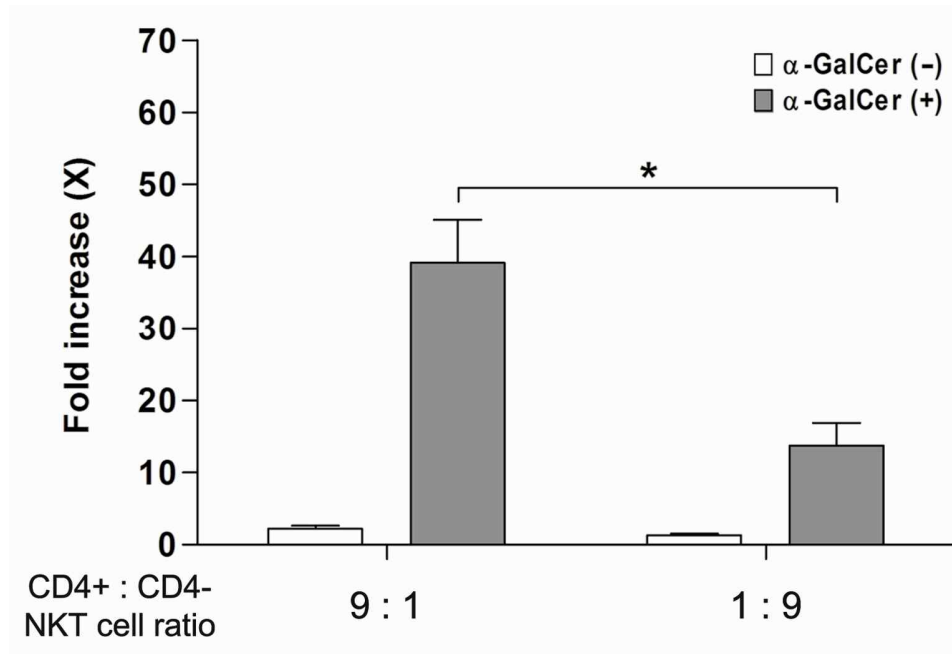

**Fig. S4. Changes in the magnitude of responses to  $\alpha$ -GalCer according to the reconstitution of NKT cell subsets.** CD14<sup>+</sup> monocytes, CD4<sup>+</sup> and CD4<sup>-</sup> NKT cells were isolated from PBMCs of healthy control subjects by FACS. Monocytes were used as a source of APCs. Freshly isolated monocytes ( $1 \times 10^5$  cells/well) were cocultured with reconstituted NKT cells ( $1 \times 10^5$  cells/well) for 7 days in the presence of IL-2 (100 U/ml) and  $\alpha$ -GalCer (100 ng/ml). The cells were then stained with PerCP-conjugated anti-CD3 and PE-conjugated anti-6B11 MAbs. Proliferation index was defined as the ratio of NKT cell percentage within CD3<sup>+</sup> T cells on day 7 to NKT cell percentage within CD3<sup>+</sup> T cells on day 0, and indices are expressed as fold increases. The results of six independent experiments are presented as means  $\pm$  SEMs. \*,  $P < 0.005$  by Mann-Whitney U test.
